# Supplementary material for: Identification of an atypical etiological head and neck squamous carcinoma subtype featuring the CpG island methylator phenotype
Source: PubMed Central journal article supplement — eBioMedicine. 2017 Mar 1;17:223–36. doi: 10.1016/j.ebiom.2017.02.025 (PMC5360591; doi:10.1016/j.ebiom.2017.02.025), 2017-03-01

Supplementary figure 1.

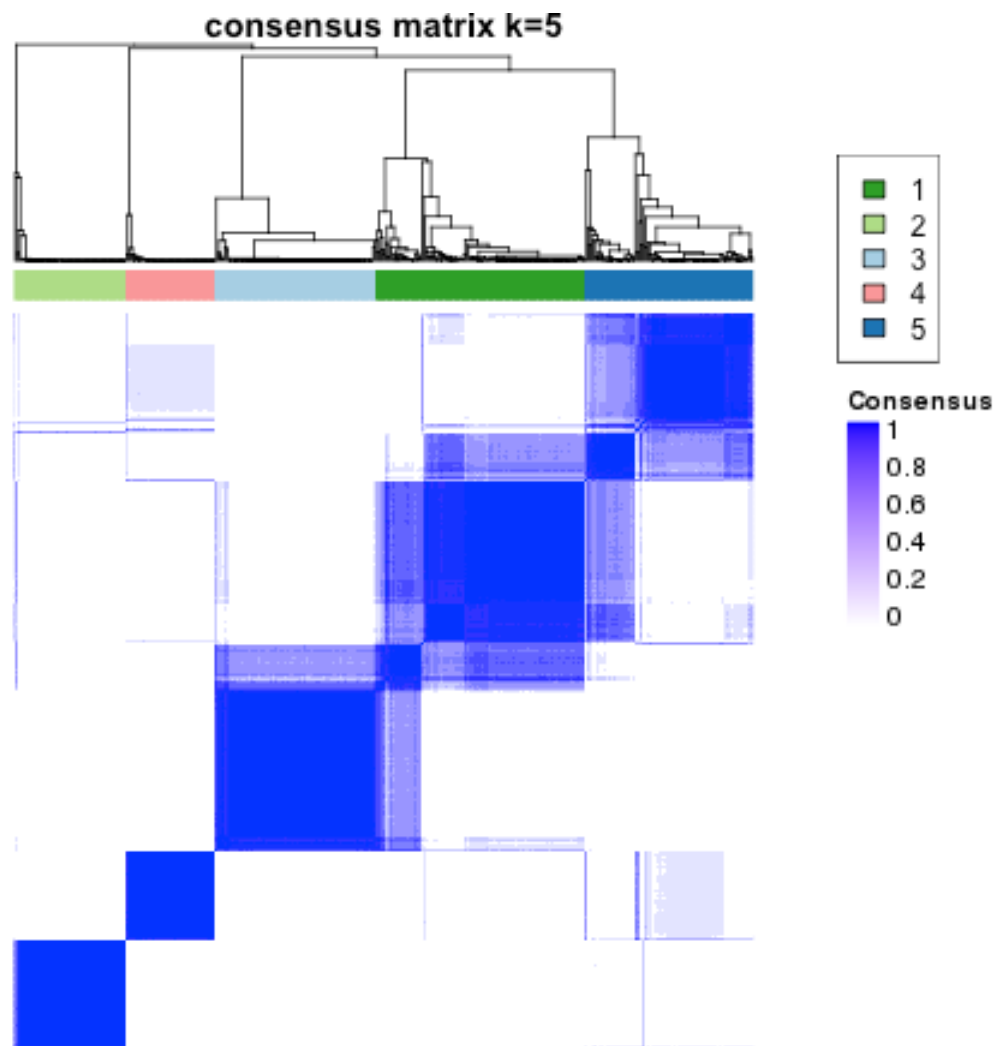

Supplementary figure 2.

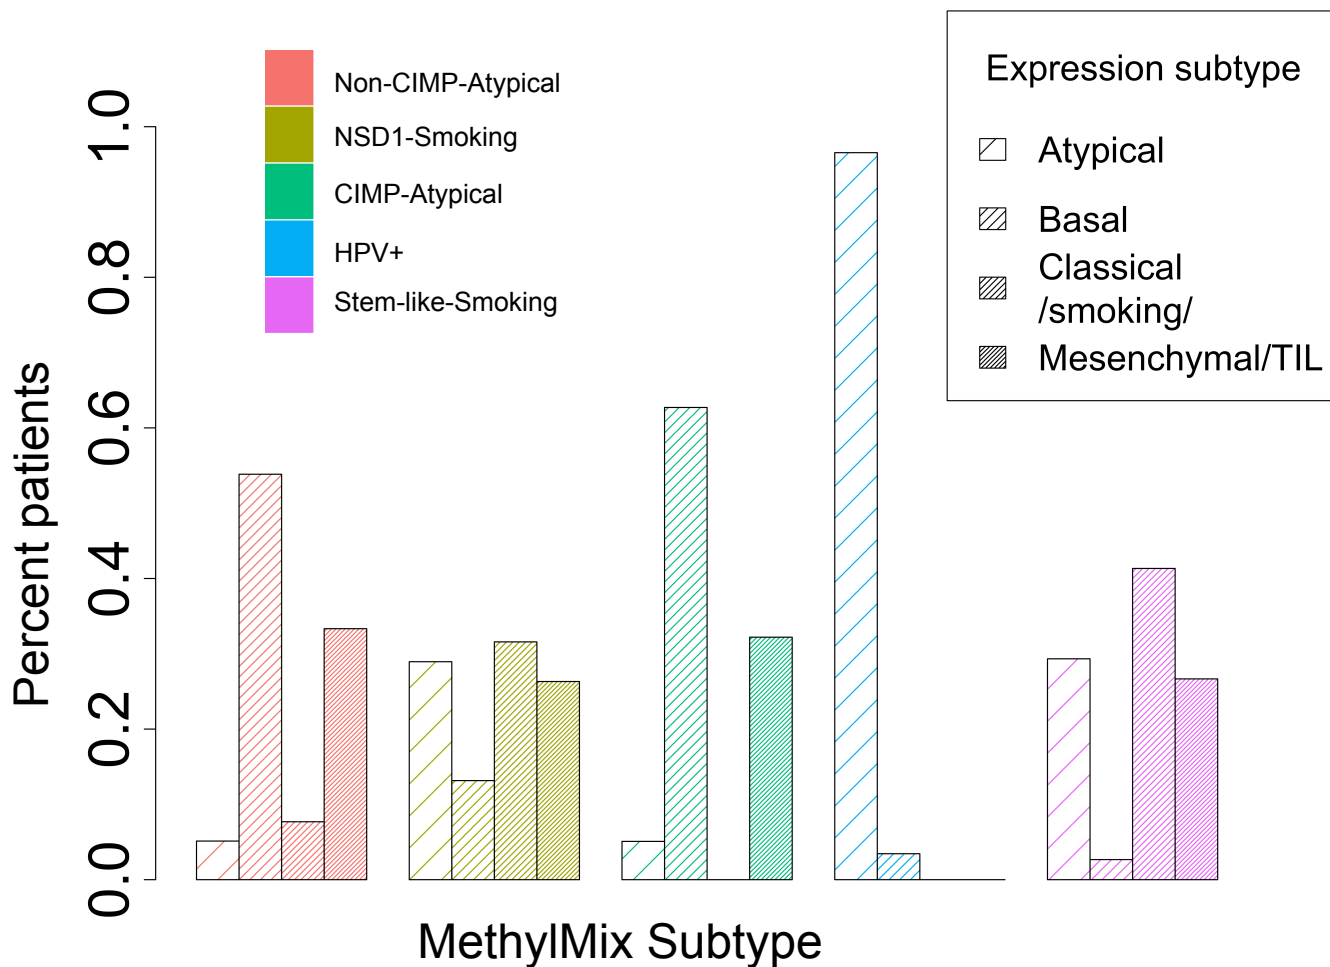

Supplementary figure 3.

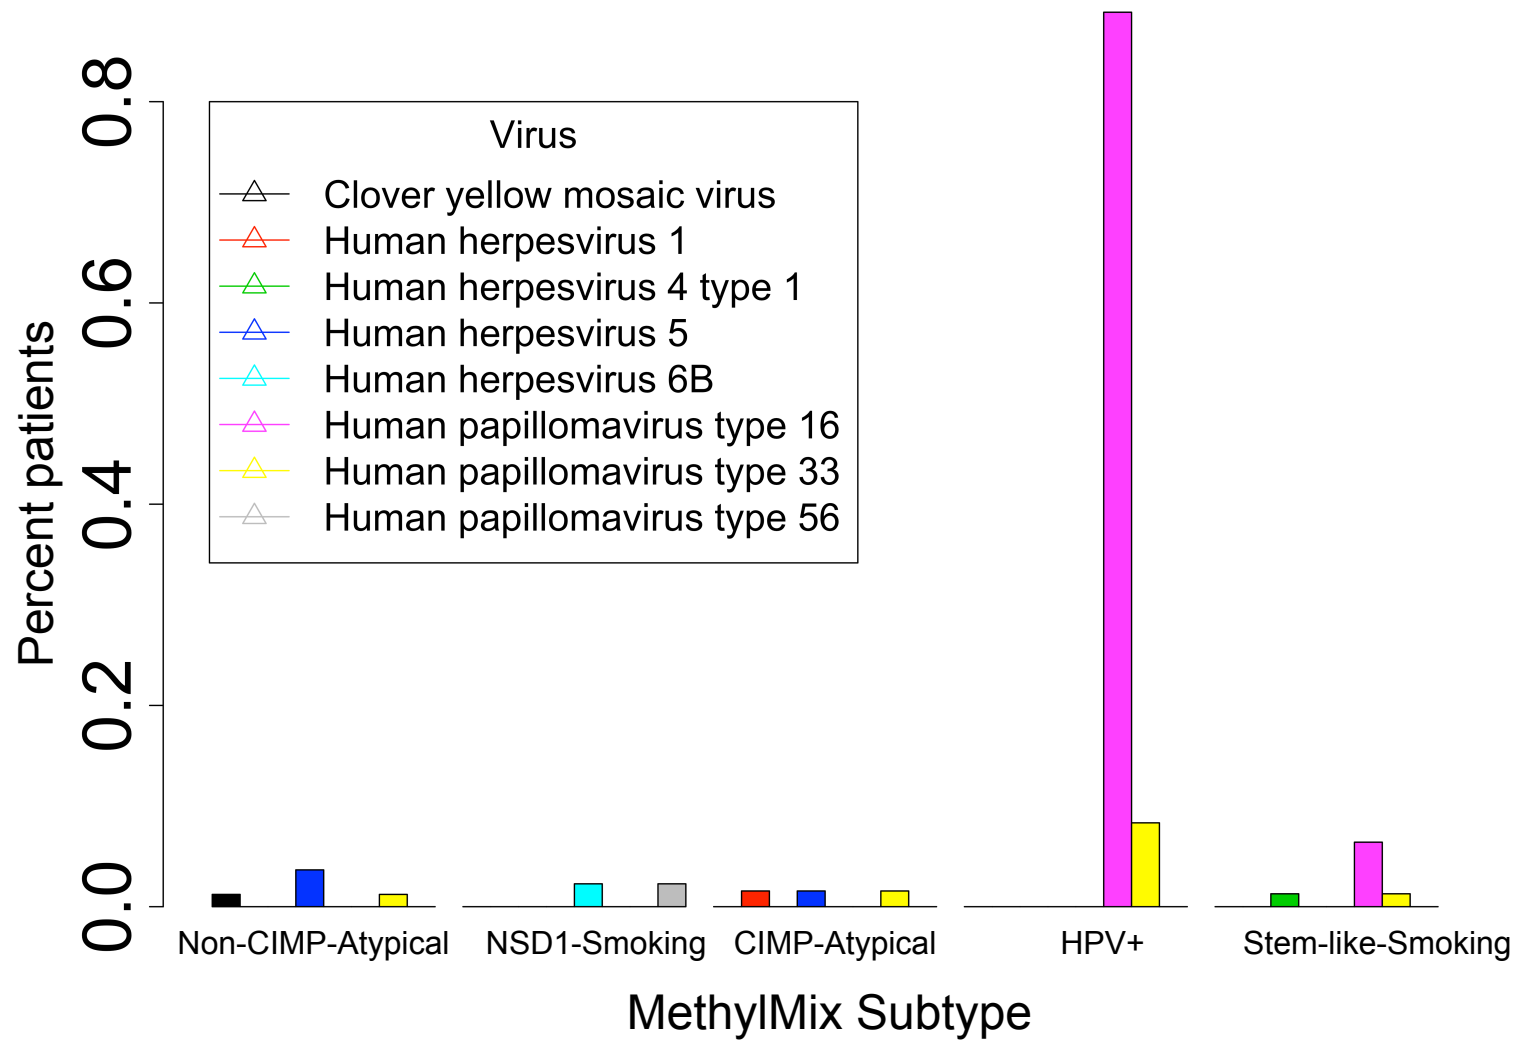

Supplementary figure 4.

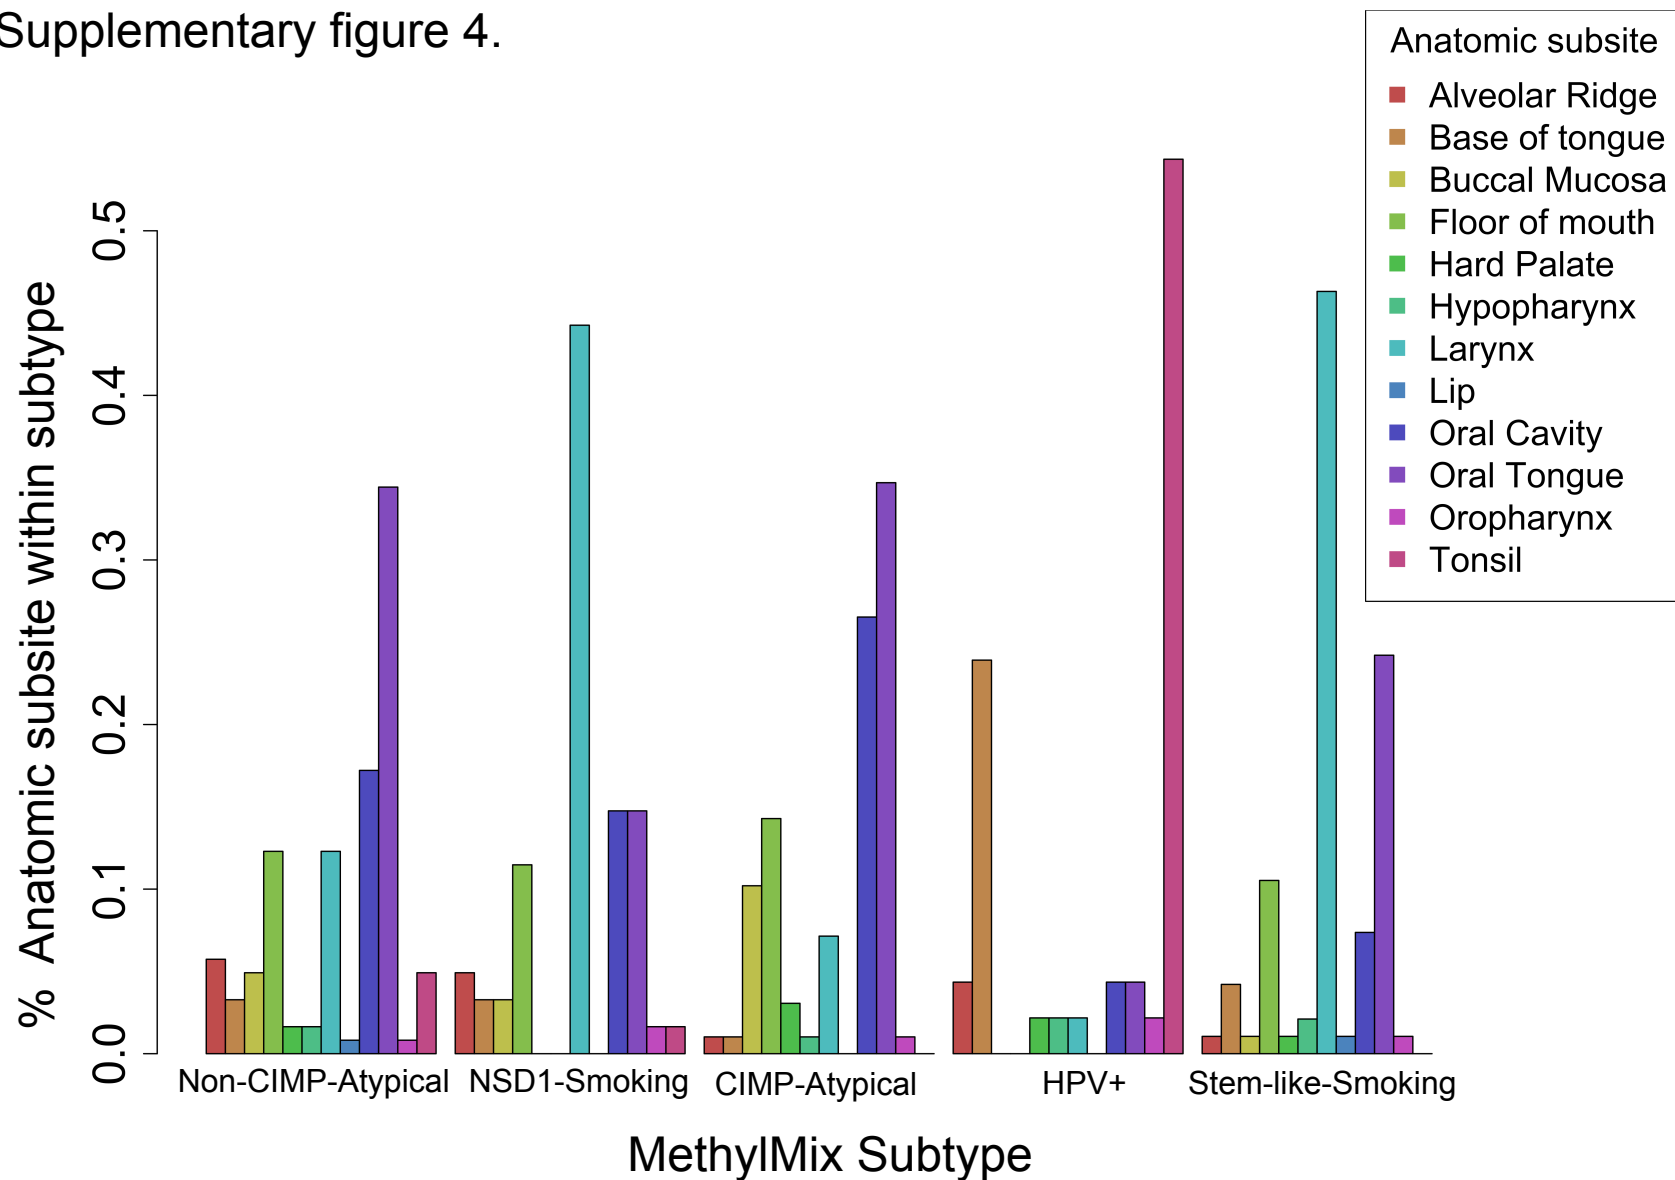



# Supplementary figure 5.

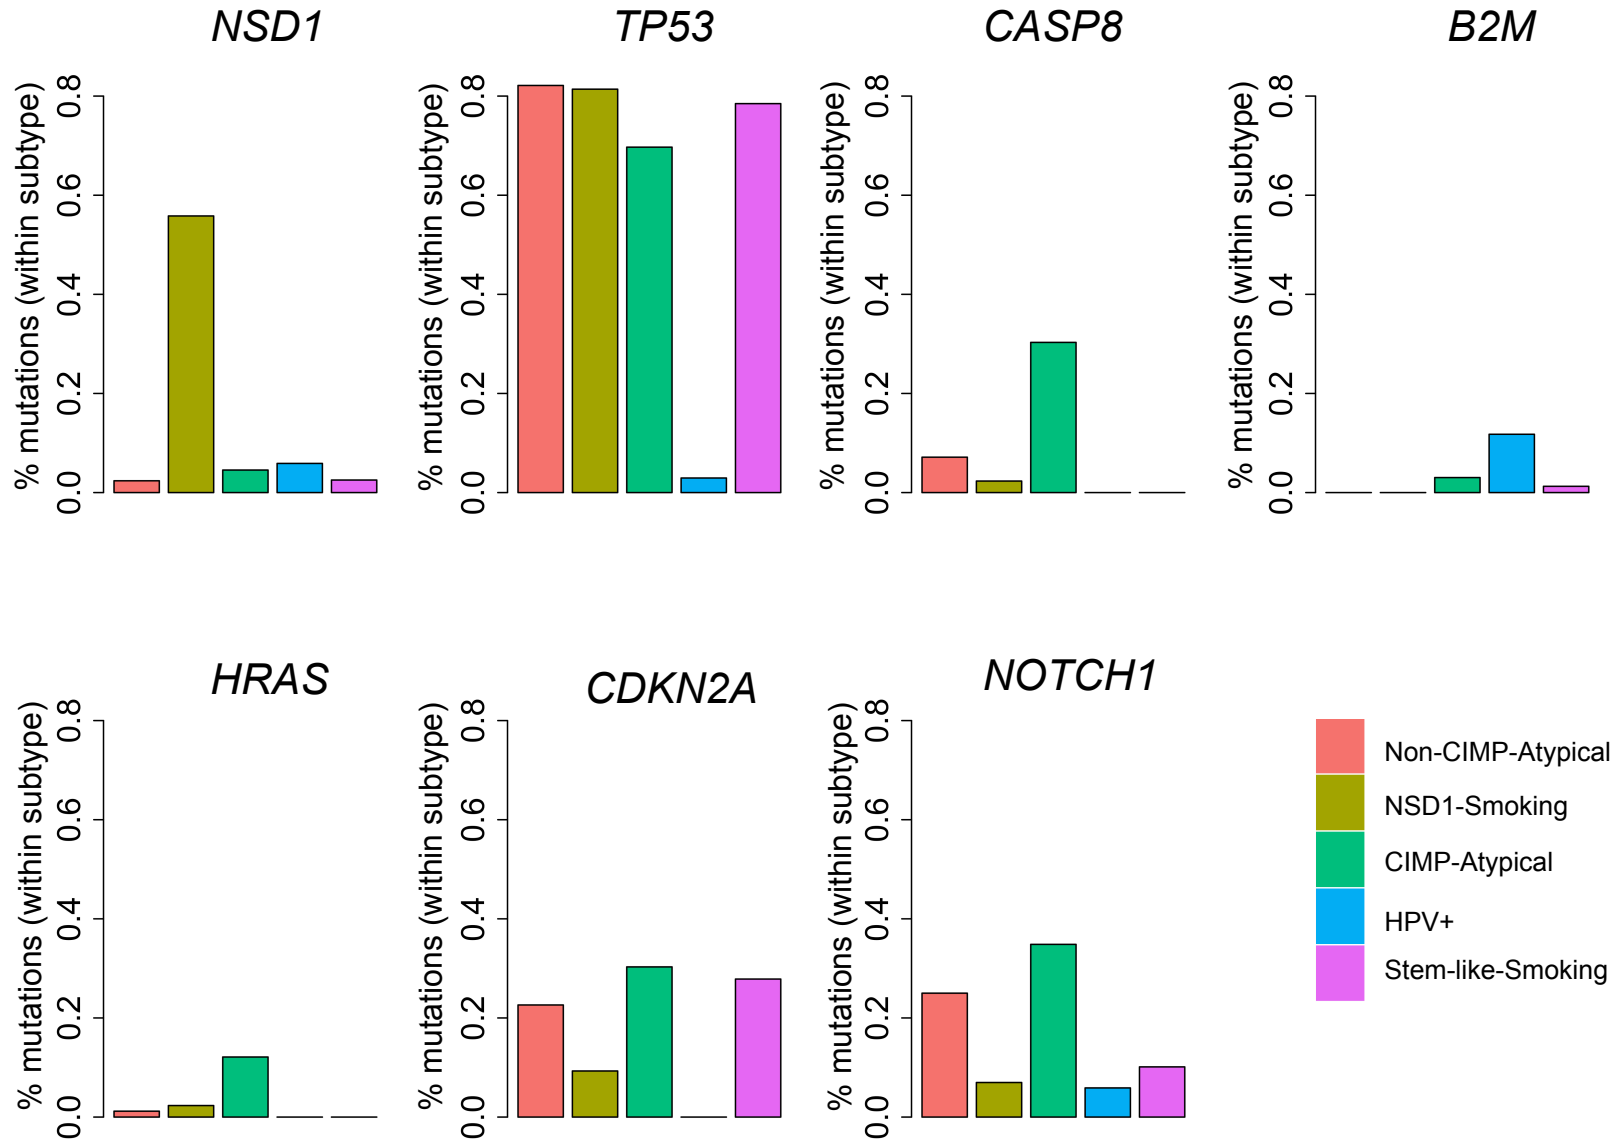

Supplementary figure 6.

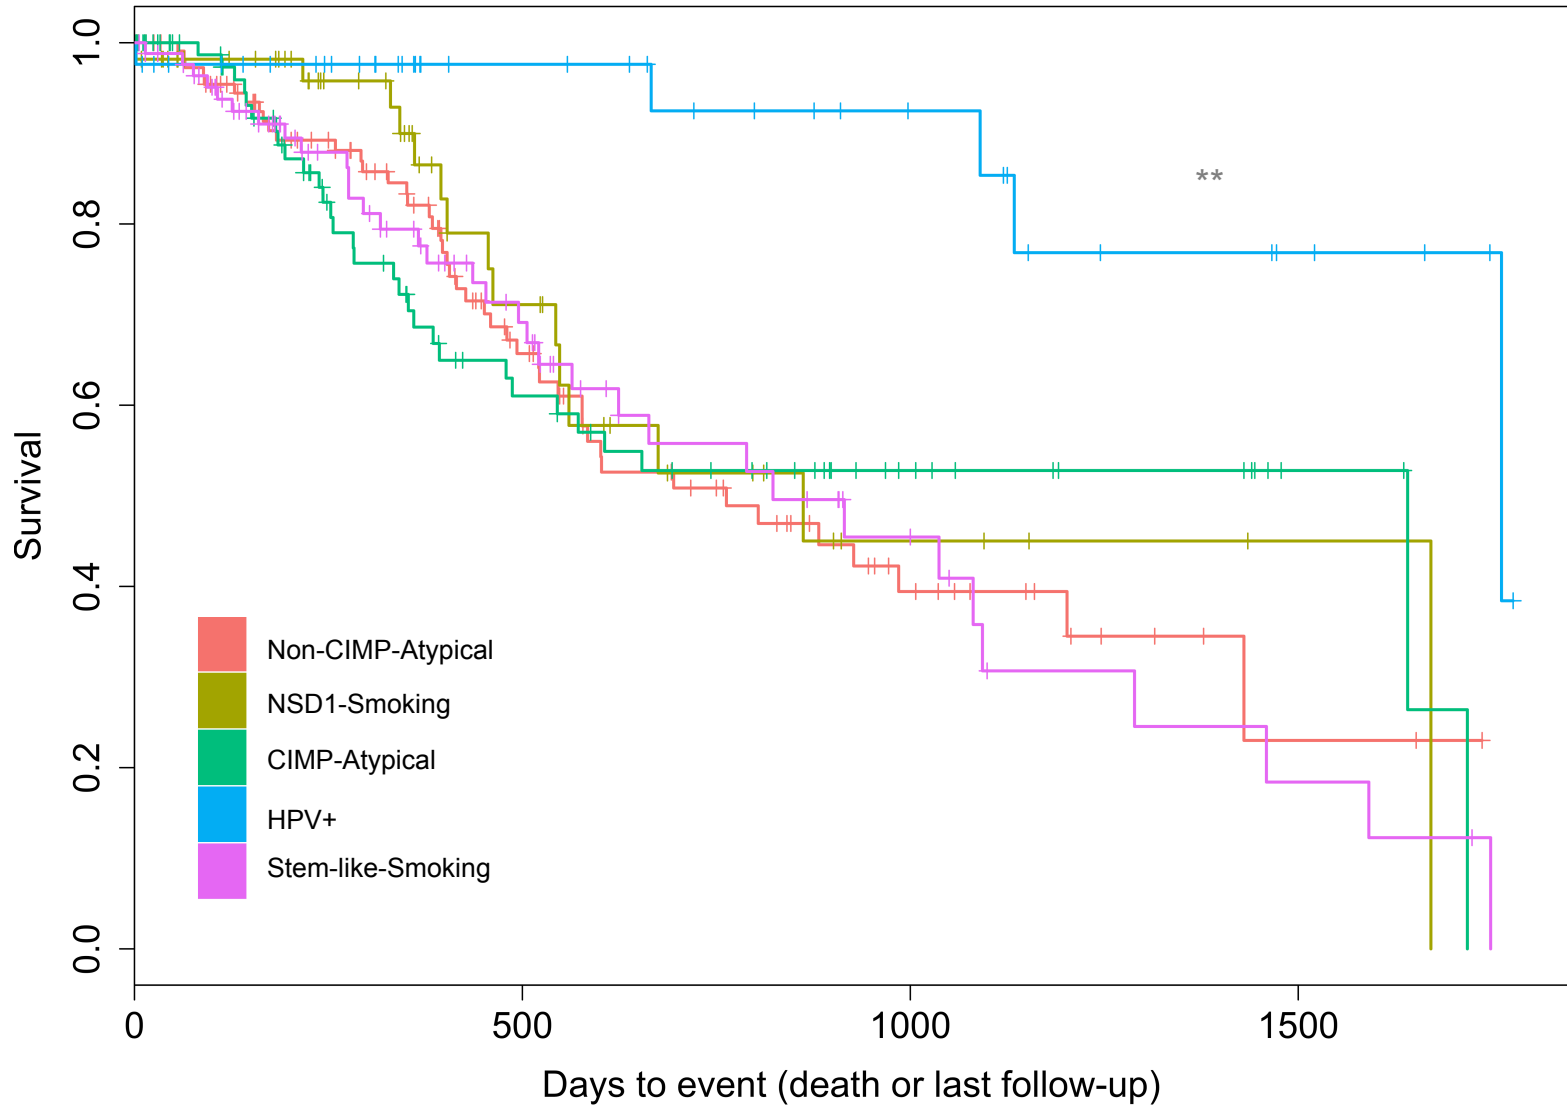

# Supplementary figure 7

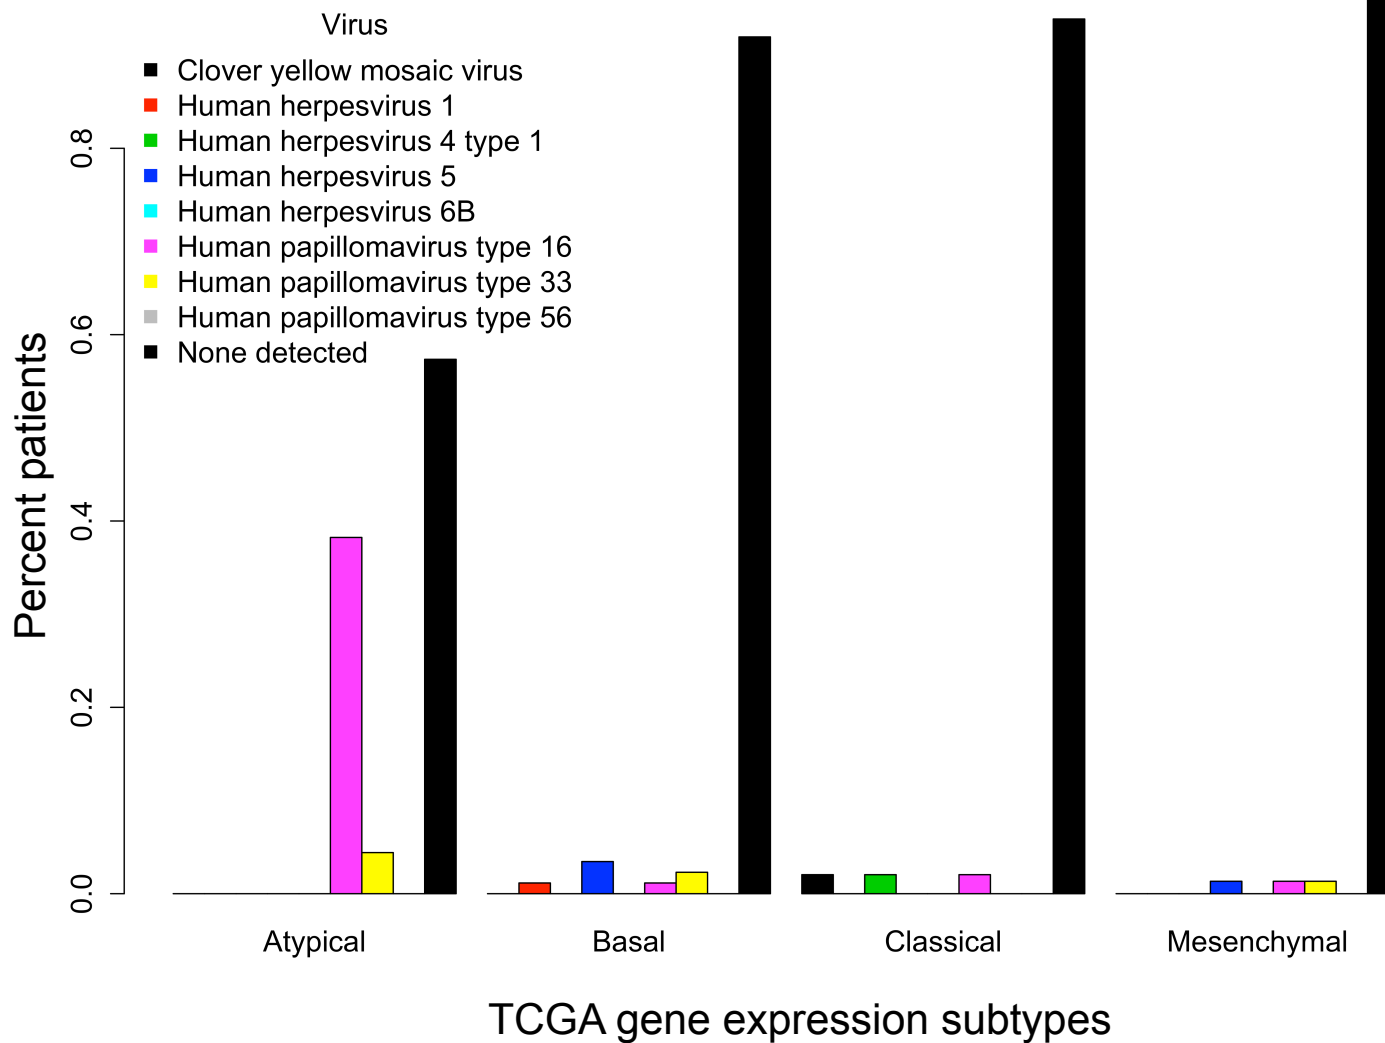

a. Supplementary figure 8

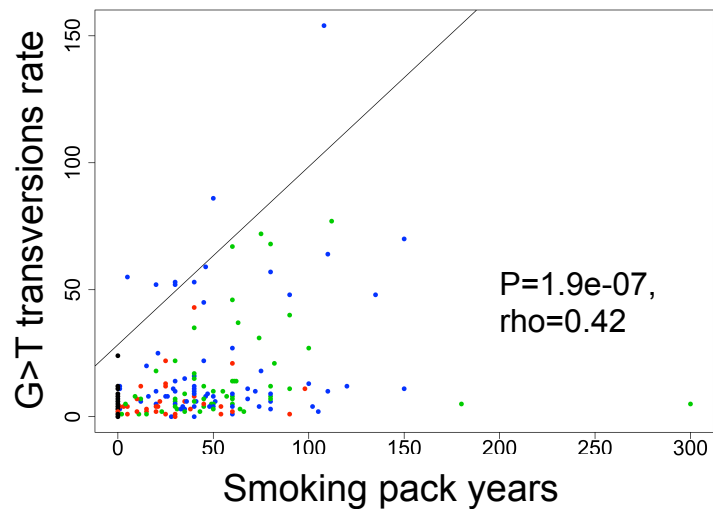

Smoking status

- Never
- Former (<15yrs)
- Former (>15yrs)
- Current

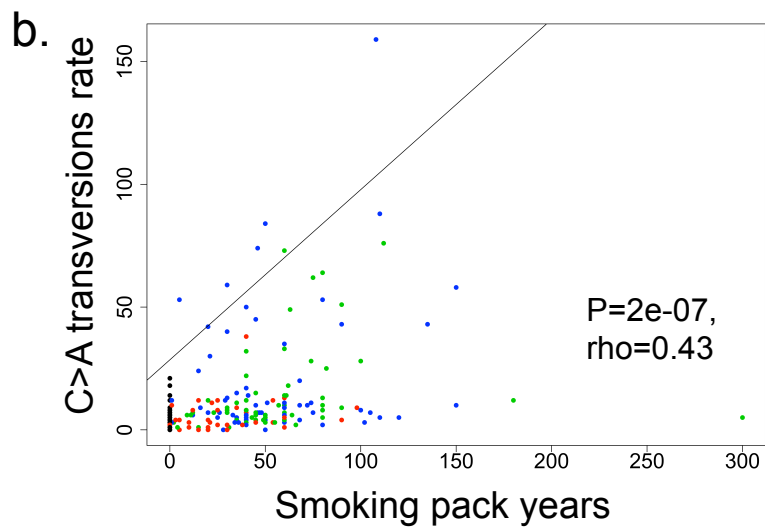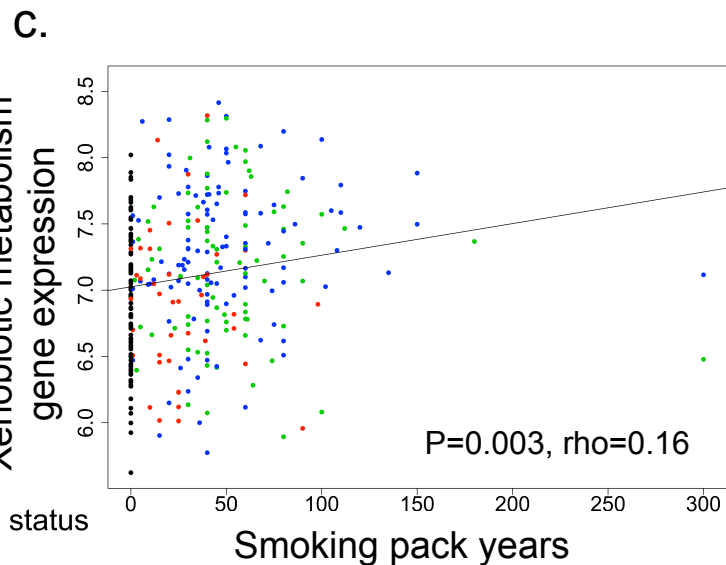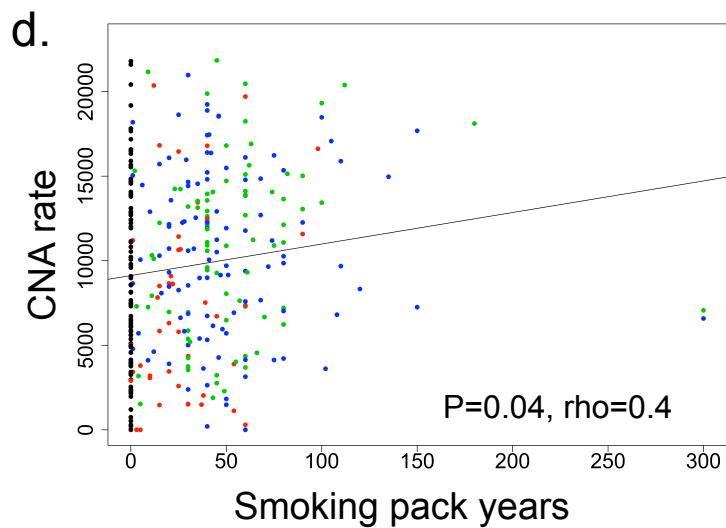

Supplementary figure 9

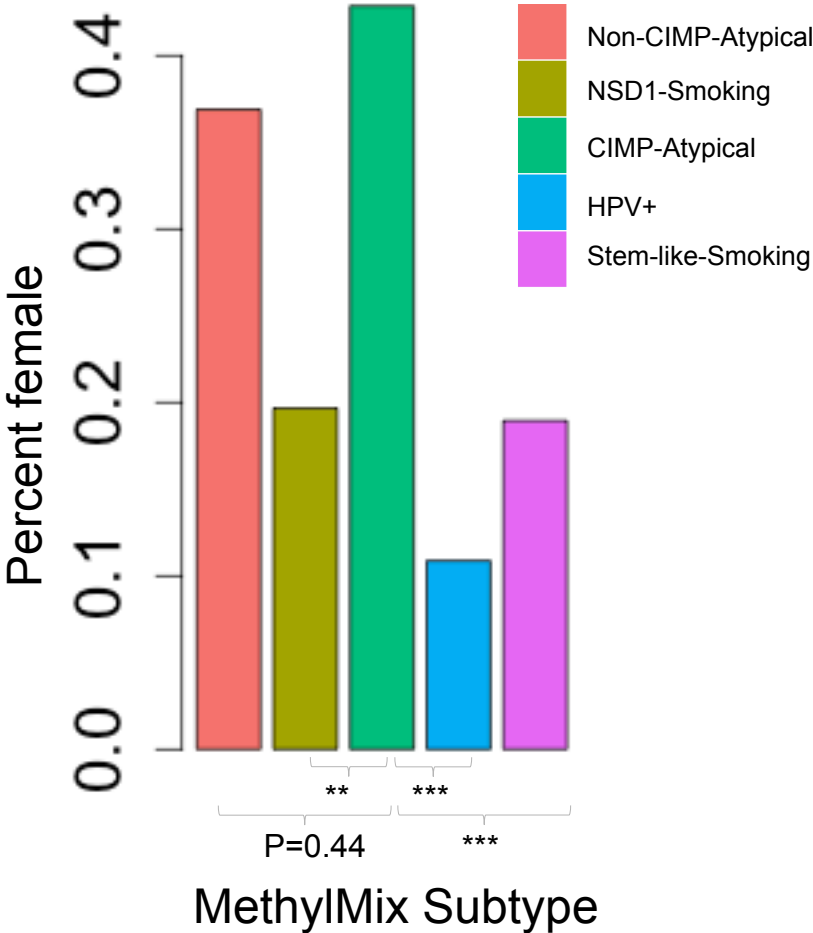

Supplementary figure 10

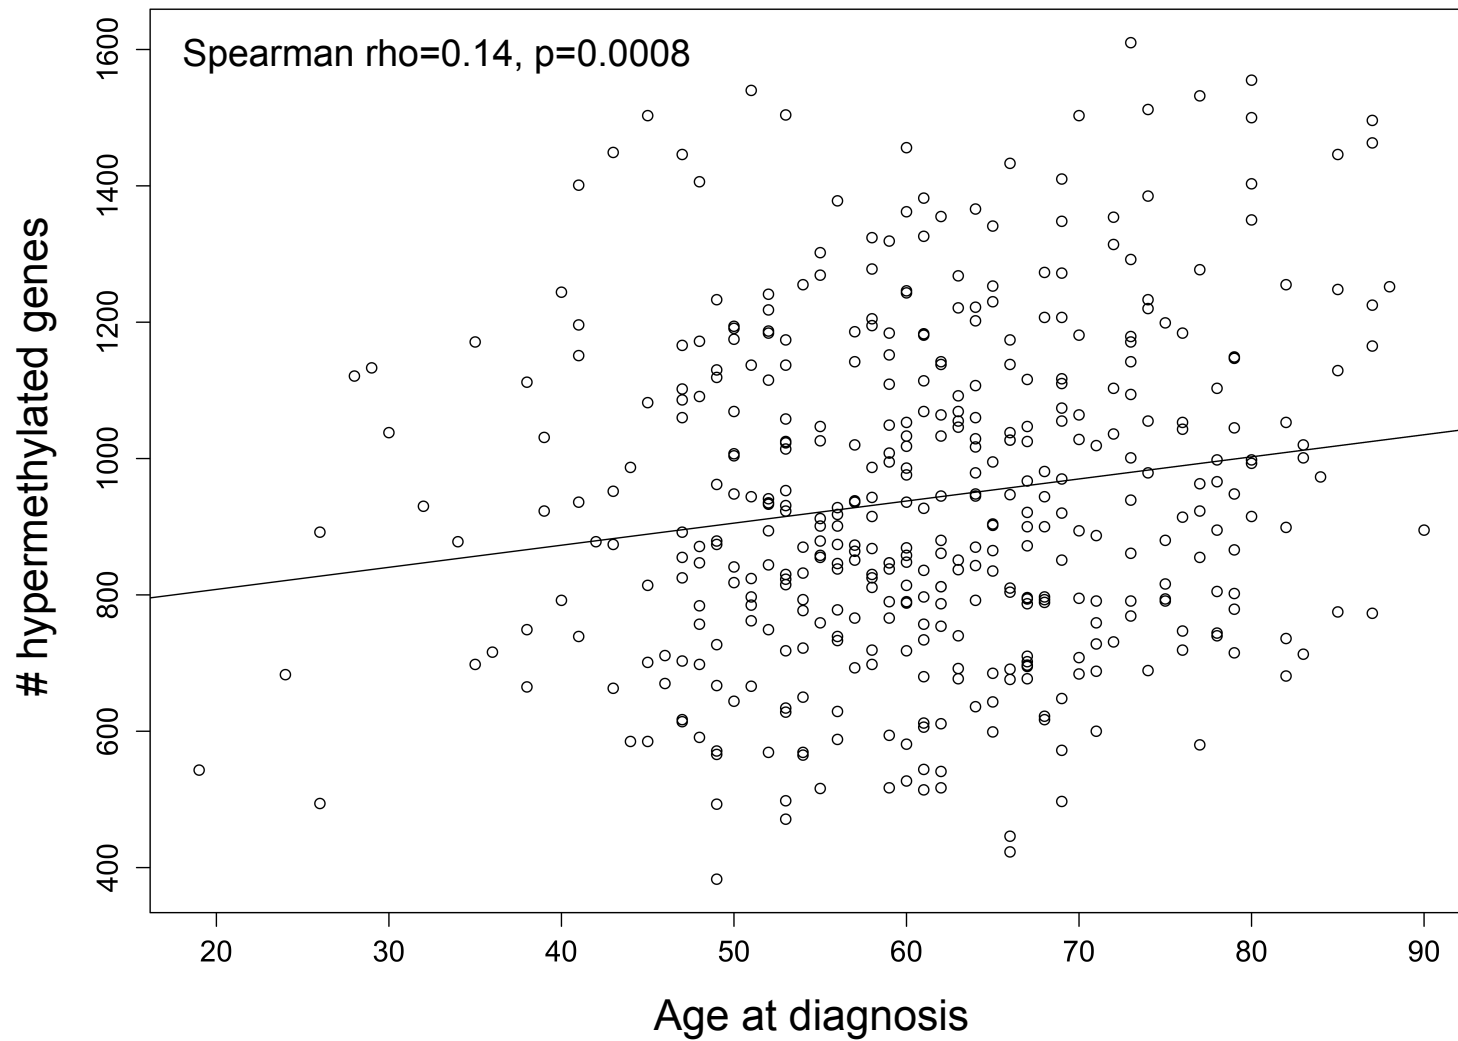

# Supplementary figure 11.

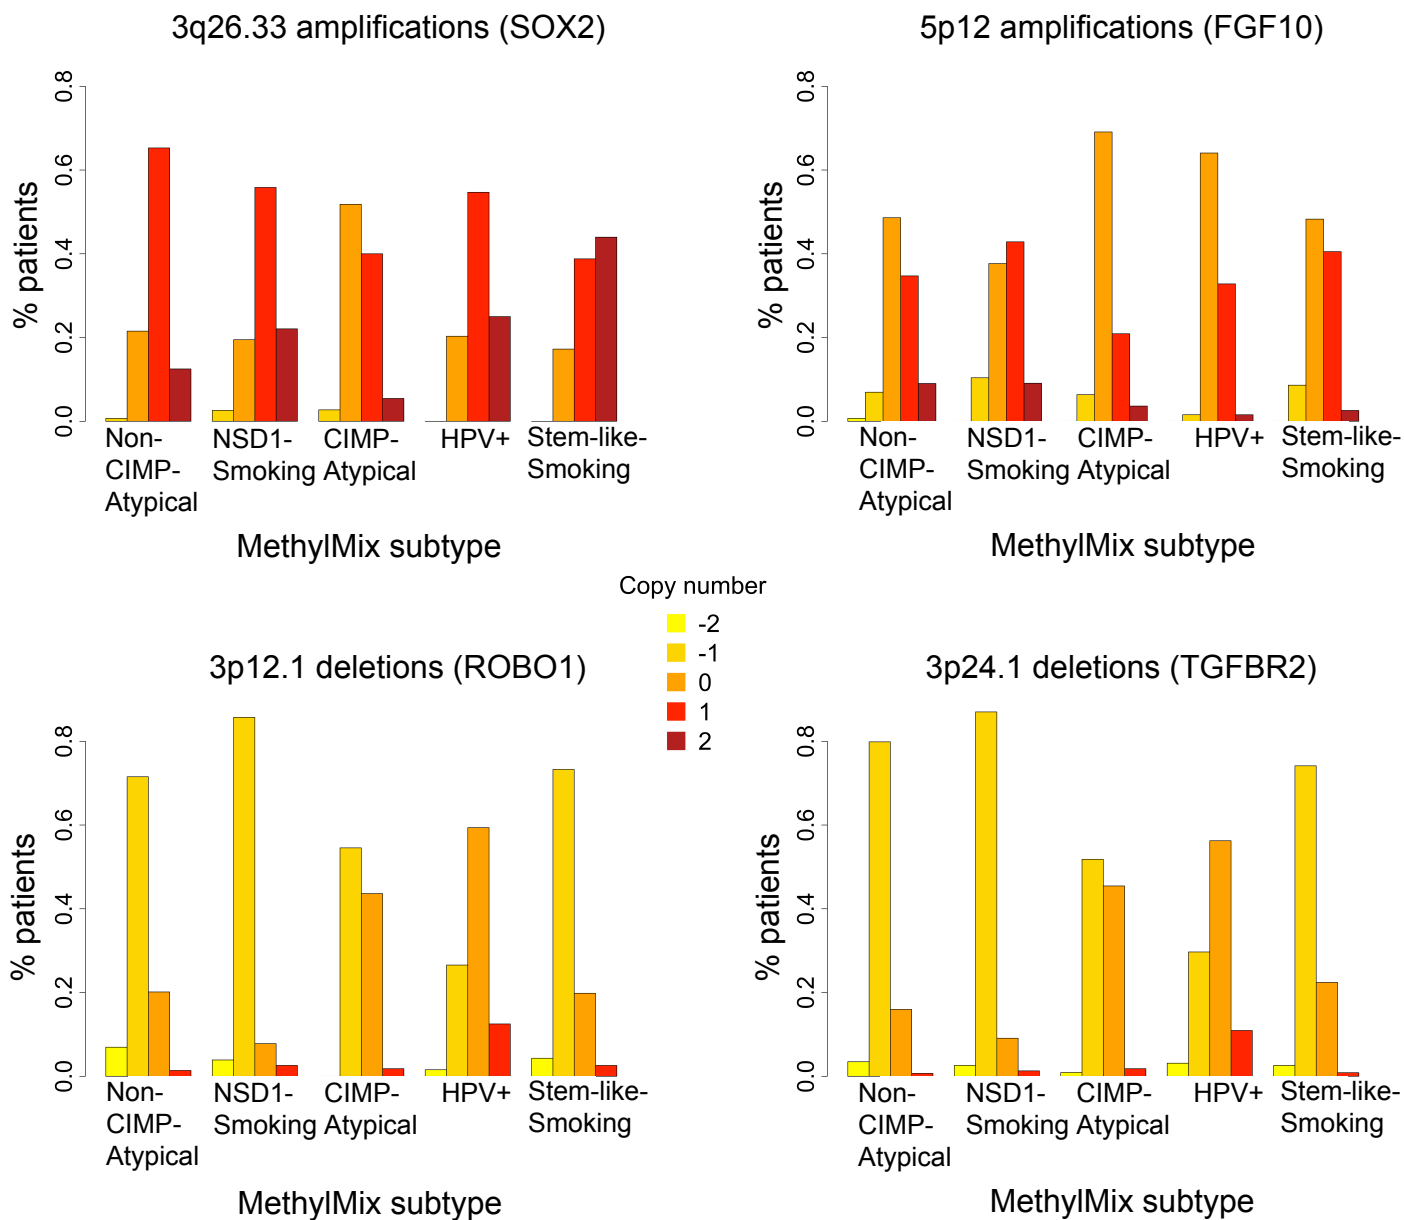

# Supplementary Figure 12.

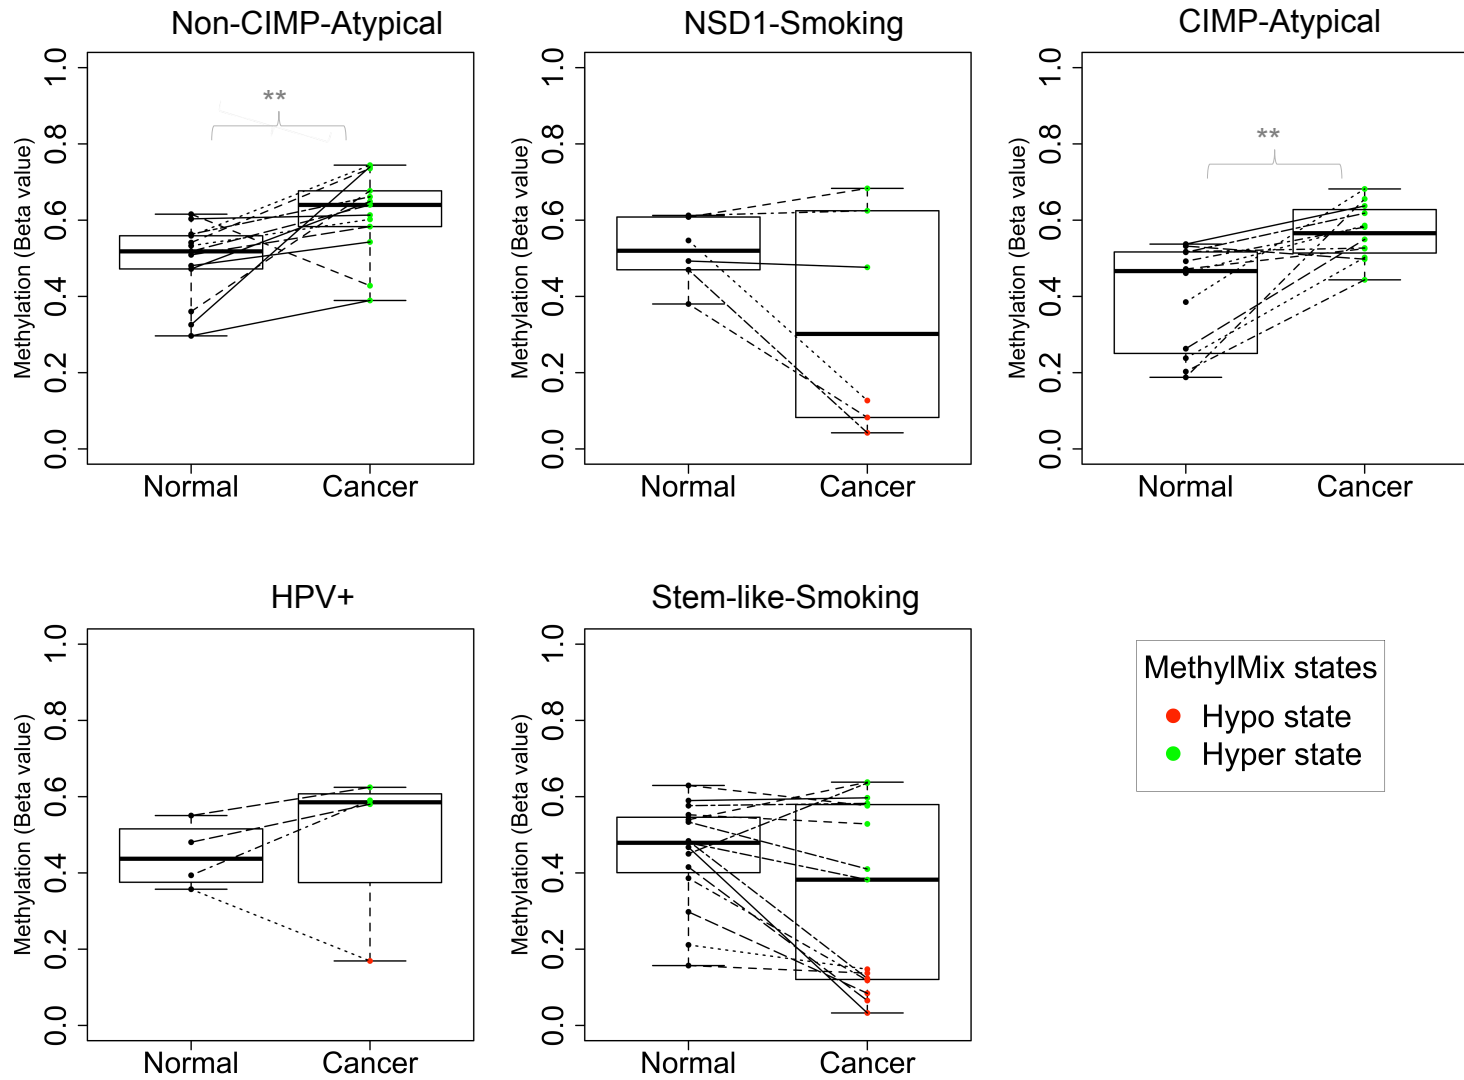



# Supplementary figure 13.

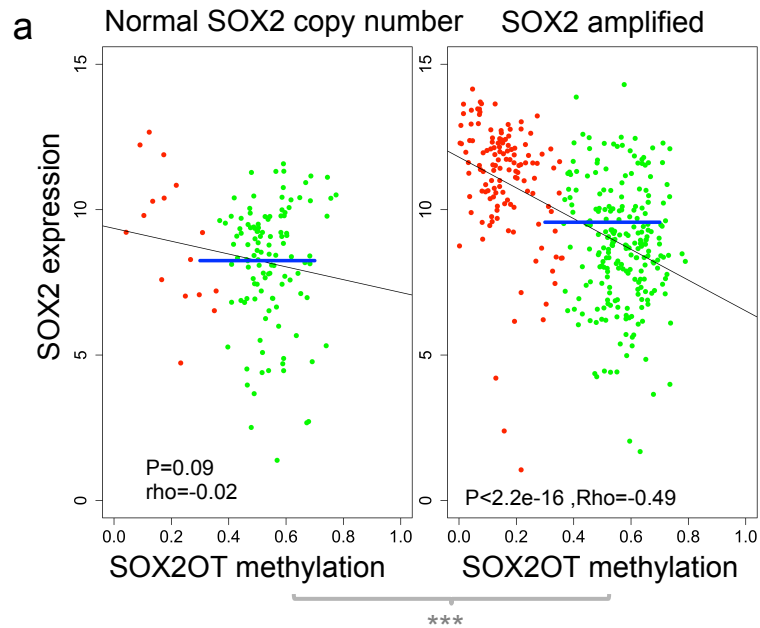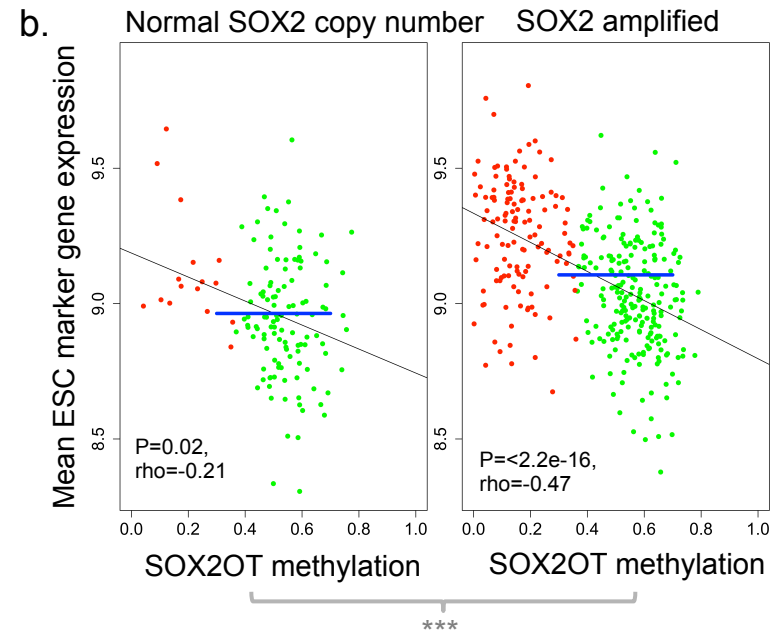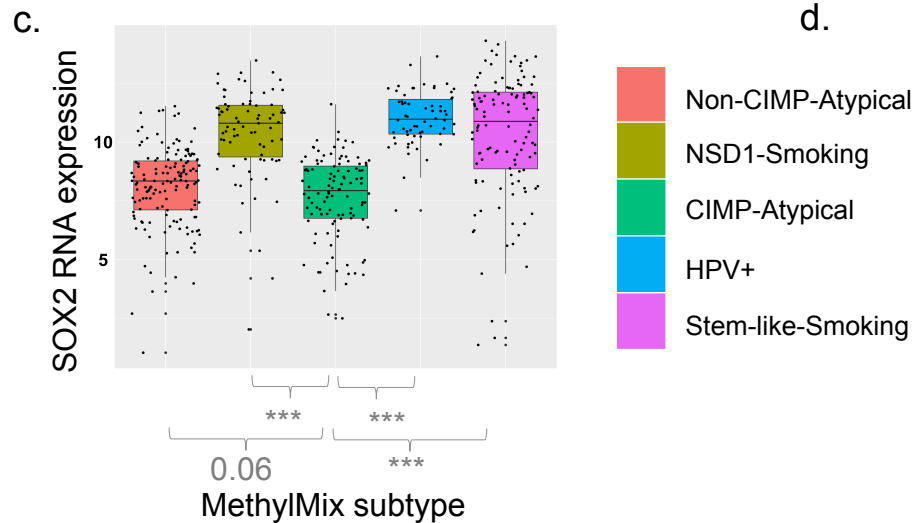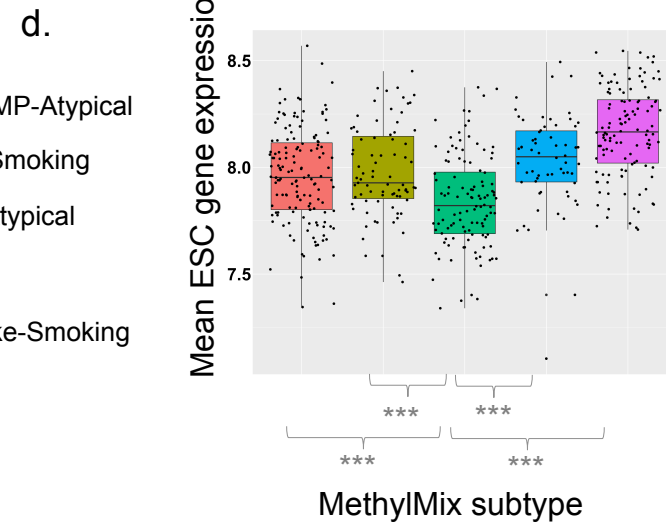

Supplementary figure 14.

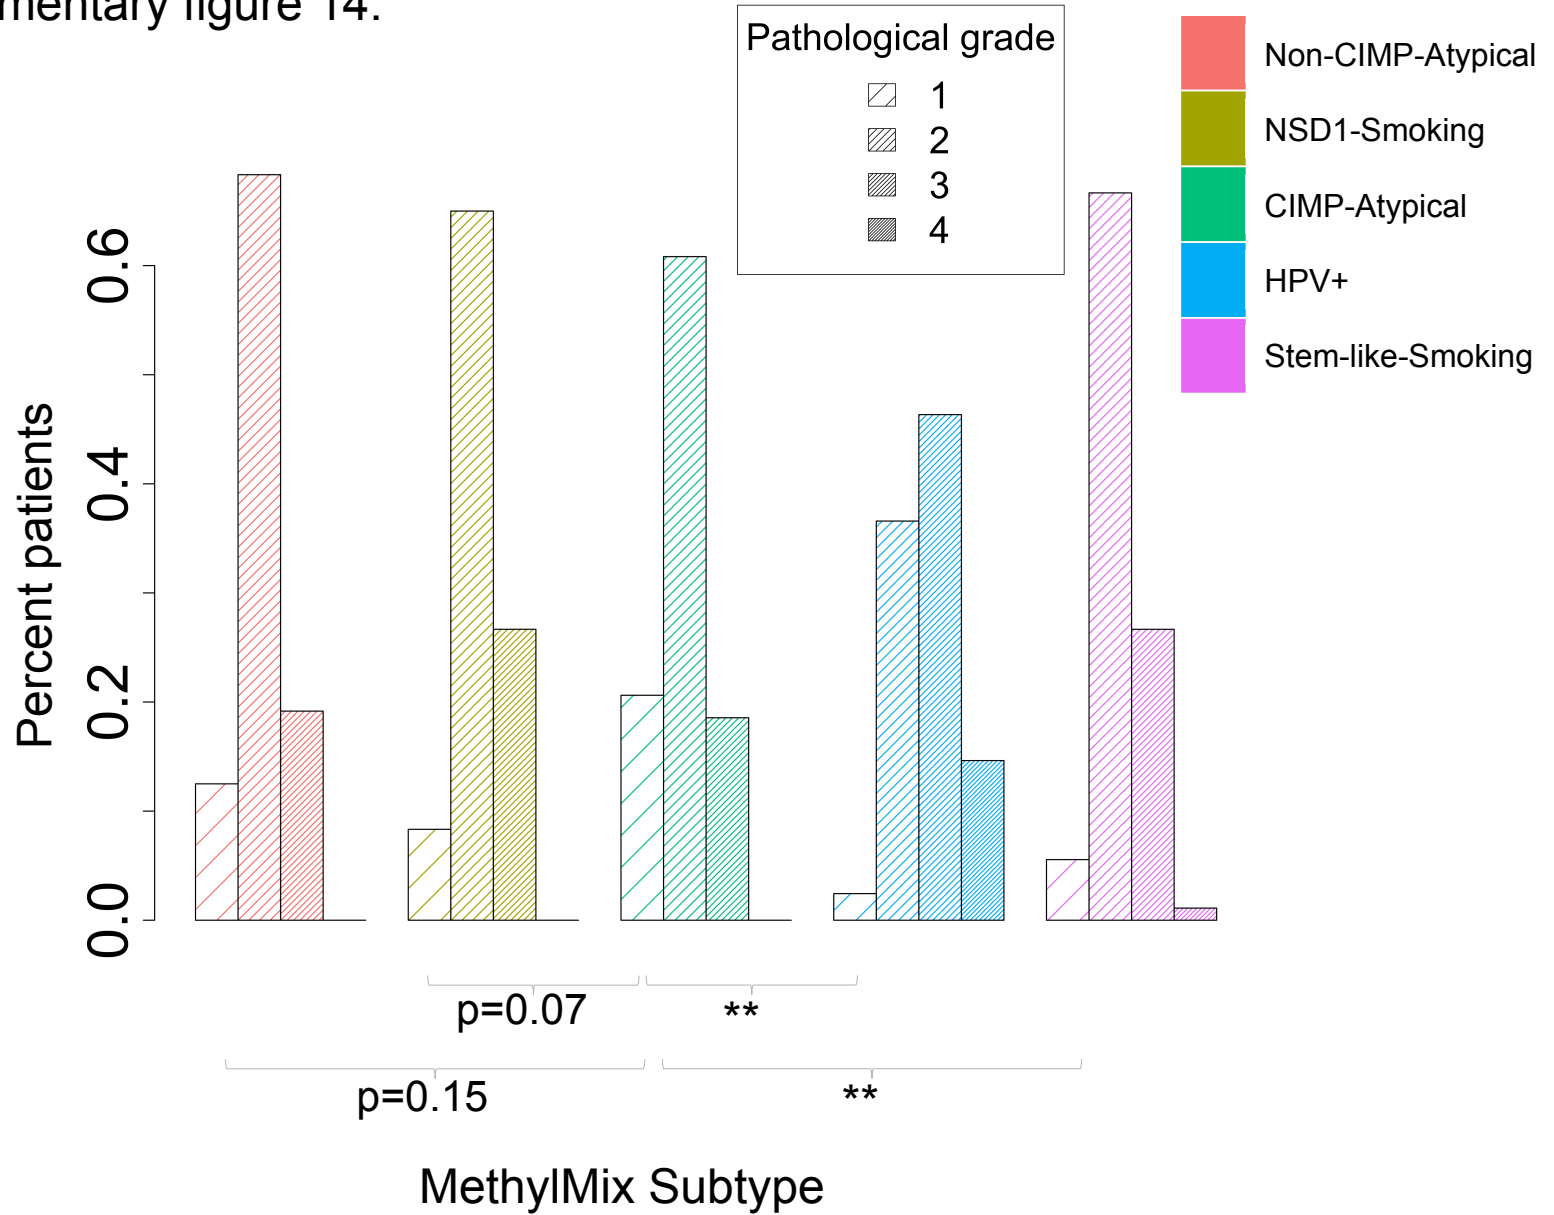

# Supplementary figure 15

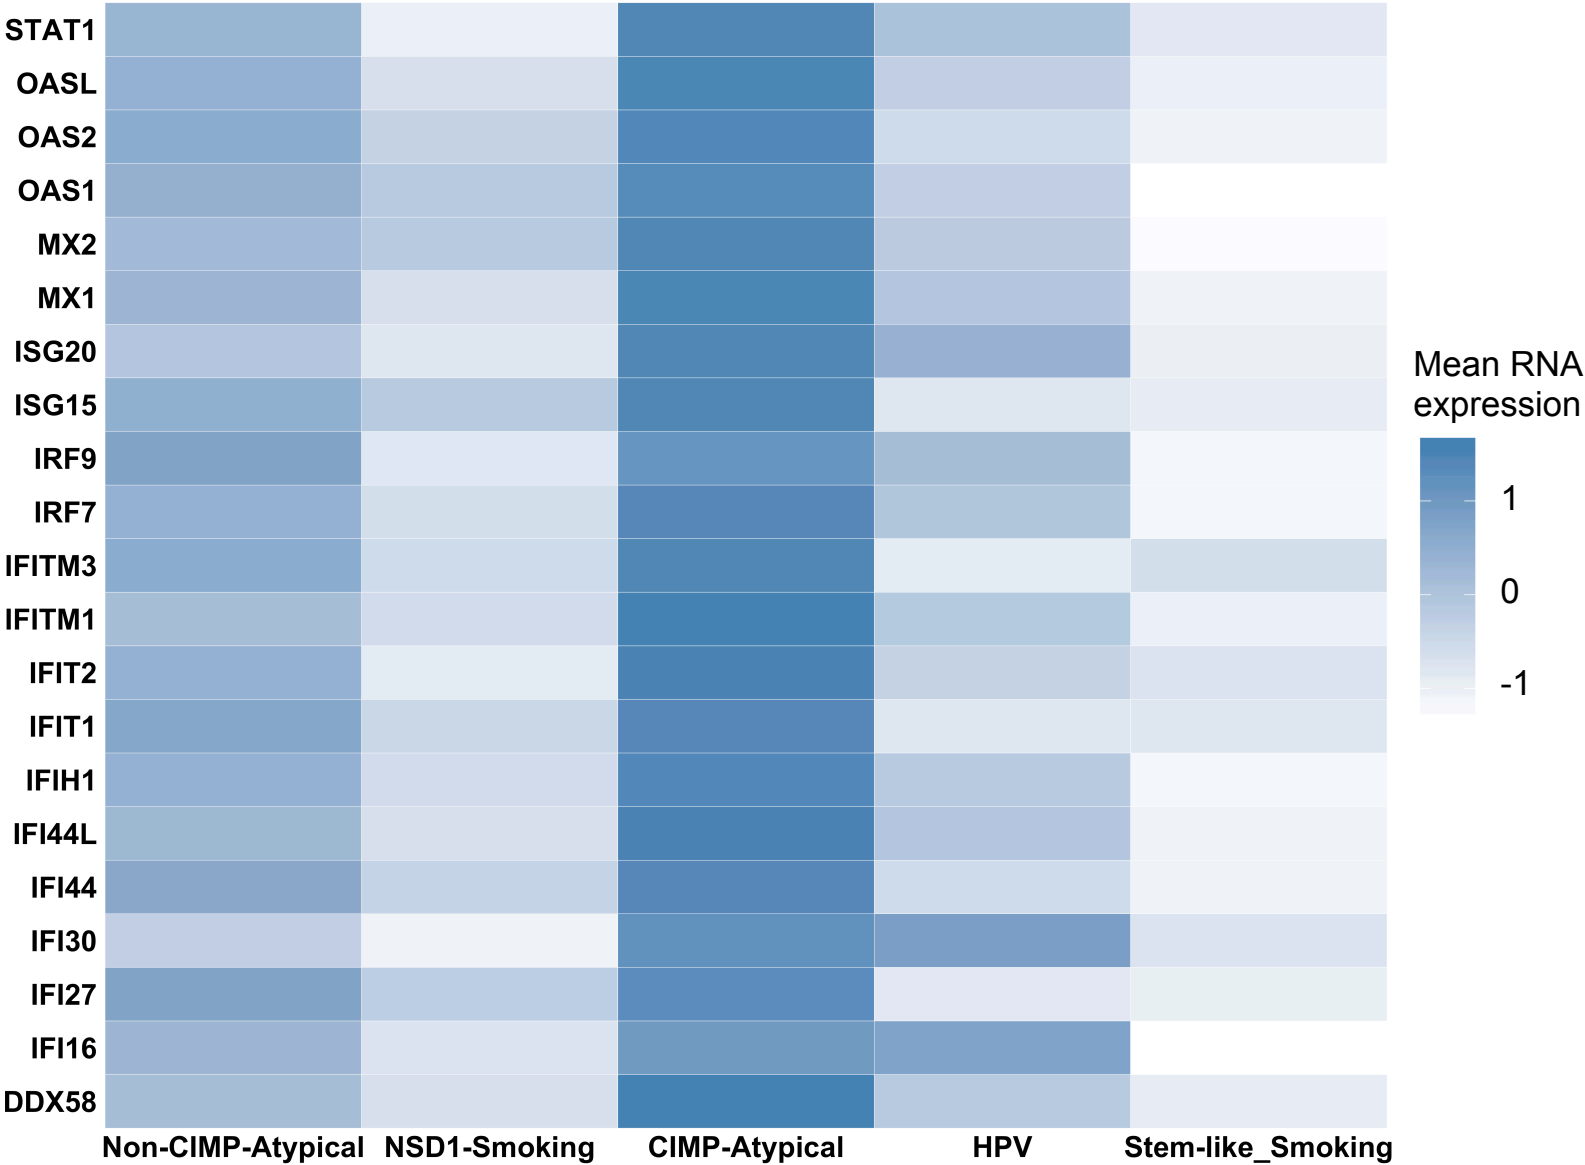

Supplementary figure 16

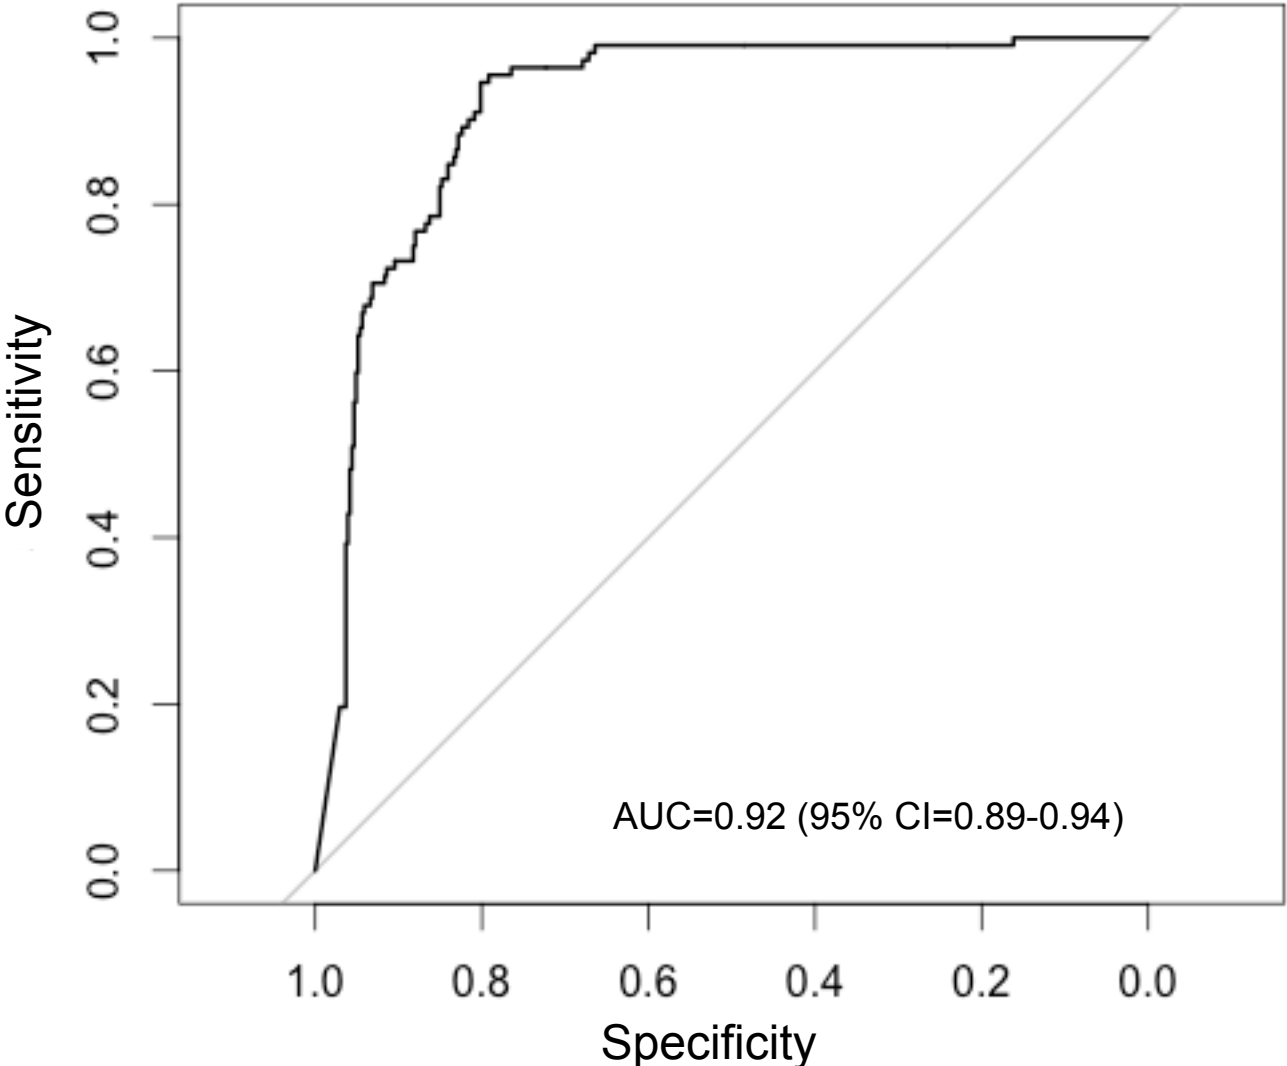

# Supplementary figure 17

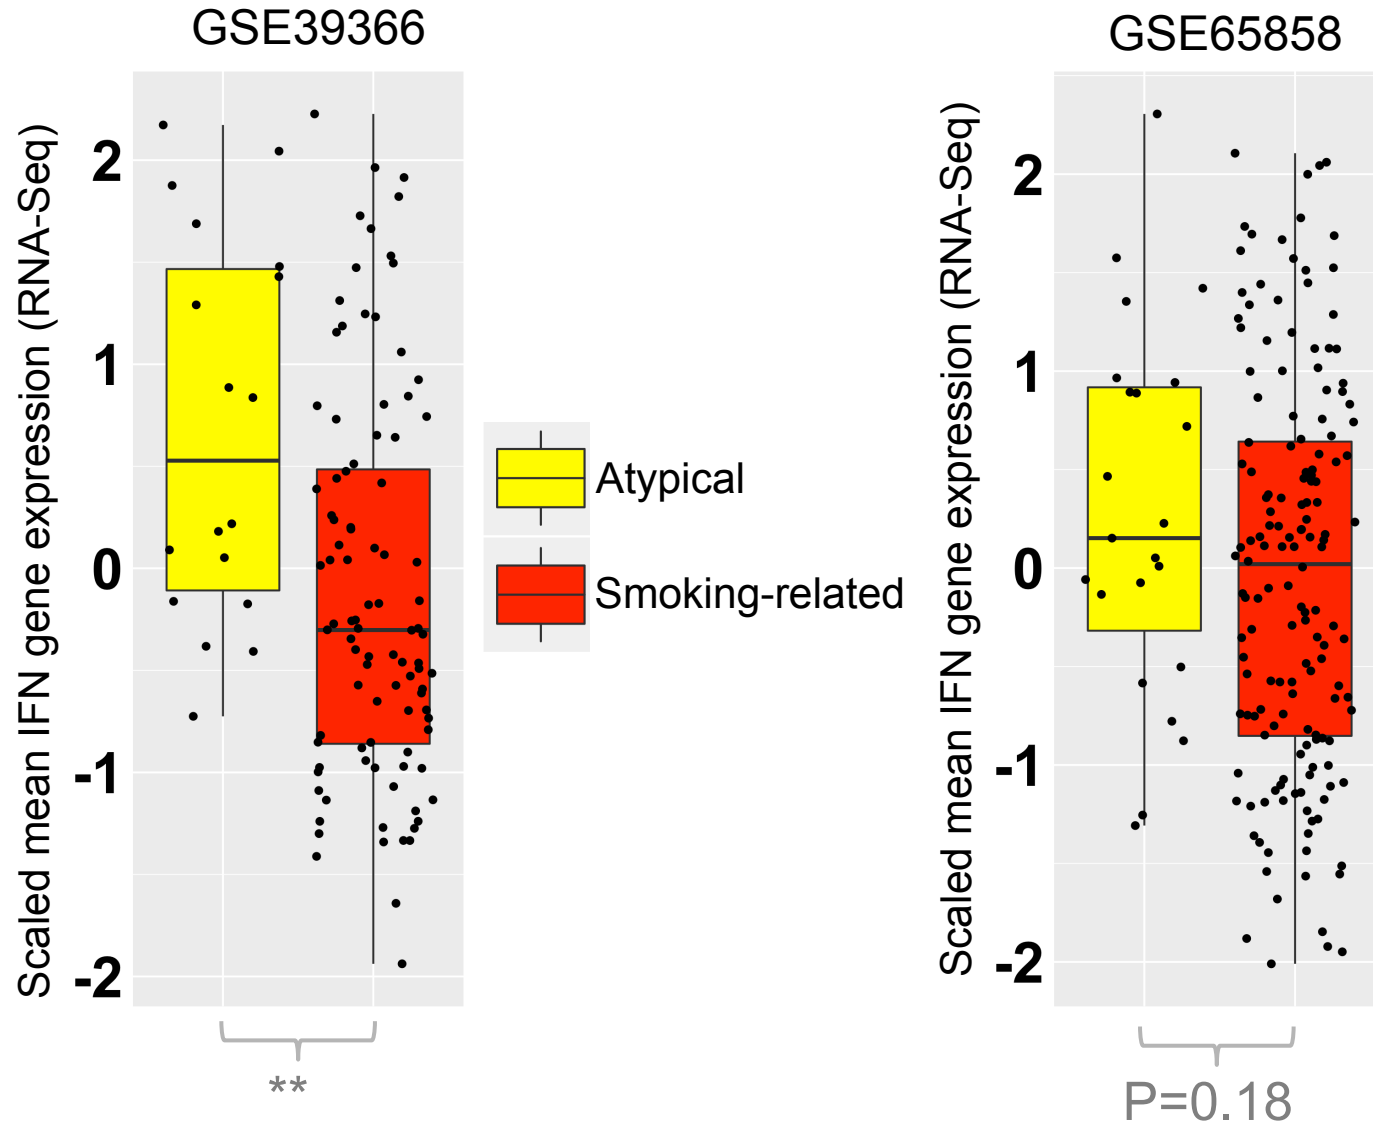

# Supplementary figure 18

## Farshadpour up genes

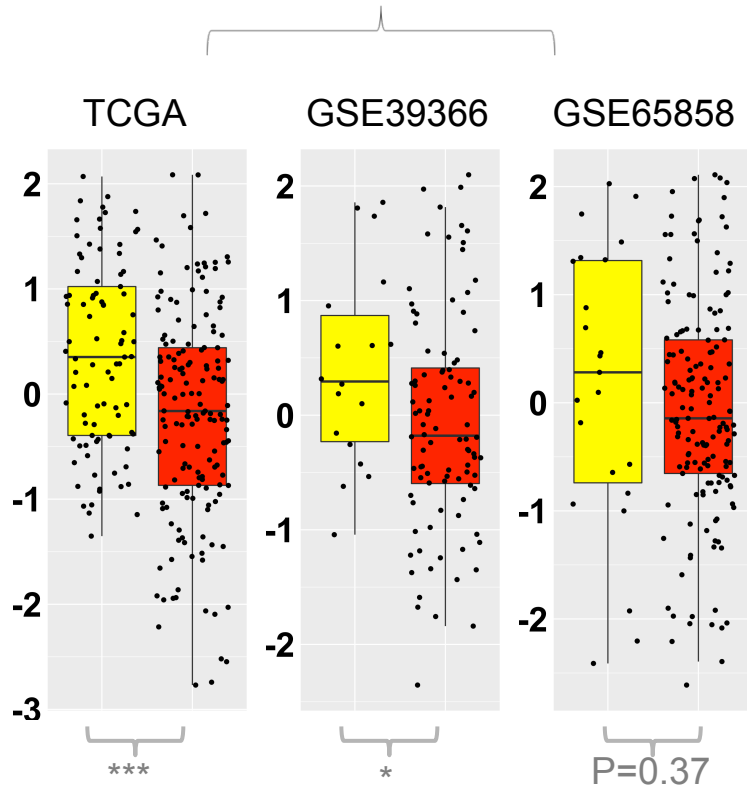

## Farshadpour down genes

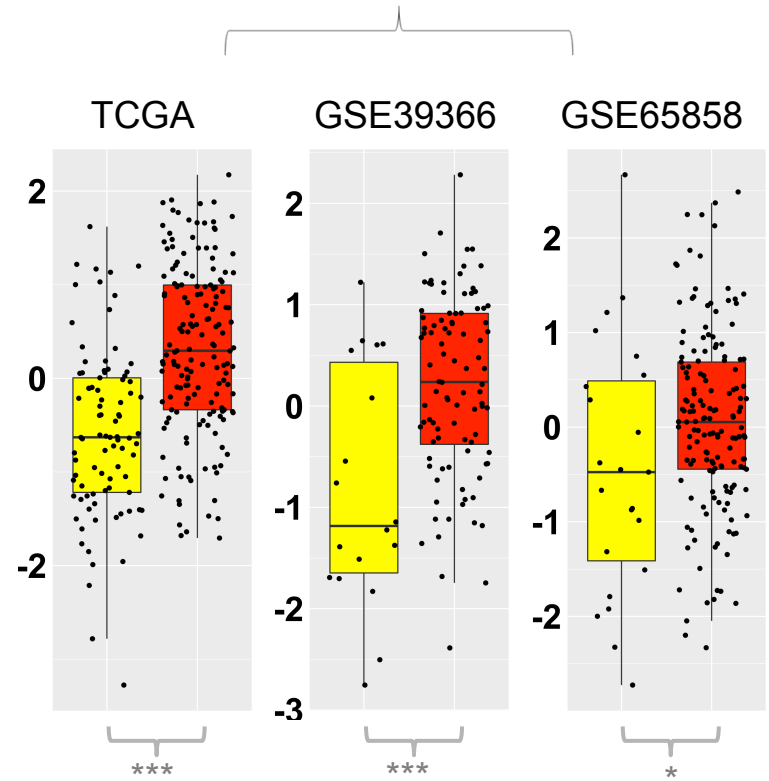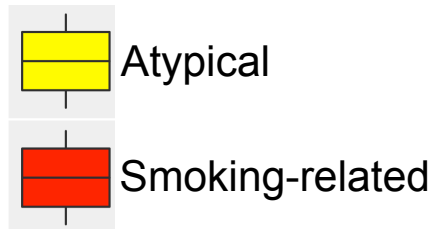

Supplement: mmc1.pdf [file mmc1.pdf]
